# Supplementary material
Source: PubMed Central journal article supplement (PMC2676025)
Supplement: M900207200_1.pdf [file M900207200_1.pdf]

CDC37 REGULATES RYK SIGNALING BY STABILIZING THE CLEAVED RYK INTRACELLULAR DOMAIN

Jungmook Lyu, Robin L. Wesselschmidt, and Wange Lu

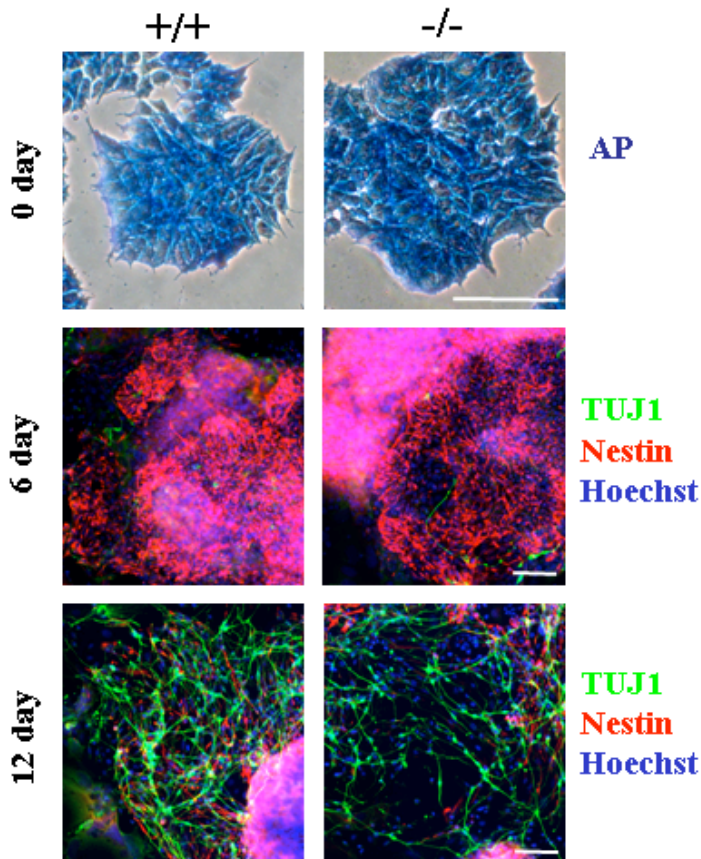

**Supplemental Figure.** Stemness of ESC was confirmed by alkaline phosphatase (AP) staining. Neural differentiation of Ryk<sup>+/+</sup>, Ryk<sup>-/-</sup> ESCs in monolayer culture was examined on day 6 and 12 by immunostaining using anti-Nestin (neural progenitor marker) antibody and -TUJ1 (immature neuronal marker) antibody. The nucleus was shown Hoechst staining. Scale bars, 100 $\mu$ m.
